# Supplementary material for: Measurement of Phthalate Acid Esters in Non-alcoholic Malt Beverages by MSPE-GC/MS Method in Tehran City: Chemometrics
Source: Research Square preprint supplement (doi:10.21203/rs.3.rs-275182/v1), 2021-03-10
Supplement: Supplementary file 1 [file 2812d9e7513f52648500f27d.docx]

Table S1. Explained component matrix of the 5-component PCA in the non-alcoholic malt beverages

|  | Component | | | | |
| --- | --- | --- | --- | --- | --- |
| 1 | 2 | 3 | 4 | 5 |
| pH | -.154 | .406 | .191 | -.195 | .044 |
| sugar | -.448 | .704 | -.244 | -.251 | .090 |
| volume | -.054 | .193 | -.134 | .343 | -.830 |
| total carbohydrate | .479 | .200 | -.007 | .758 | .110 |
| gas pressure | -.772 | -.453 | -.162 | .135 | .240 |
| DMP | -.002 | -.242 | -.504 | .026 | .572 |
| DEP | .709 | .416 | .407 | -.183 | .264 |
| DBP | .809 | .140 | .408 | -.315 | .006 |
| DEHP | .782 | -.228 | -.501 | -.120 | -.018 |
| DOP | -.215 | -.446 | .805 | -.131 | .039 |
| total phthalate | .822 | -.209 | -.446 | -.141 | -.008 |
| date | .301 | -.081 | .366 | .754 | .246 |
| color | -.182 | -.275 | .179 | -.067 | .066 |
| brand | -.293 | .808 | -.086 | .190 | .300 |
